# Supplementary material for: Complete response to avelumab and IL-15 superagonist N-803 with Abraxane in Merkel cell carcinoma: a case study
Source: PubMed Central journal article supplement — J Immunother Cancer. 2020 Sep 10;8(2):e001098. doi: 10.1136/jitc-2020-001098 (PMC7484858; doi:10.1136/jitc-2020-001098), 2020-09-10
Supplement: jitc-2020-001098supp001.pdf [file jitc-2020-001098supp001.pdf]

## **Complete Response to Avelumab and IL-15 Superagonist N-803 with Abraxane in Merkel Cell Carcinoma: A Case Study**

Leylah Drusbosky, PhD<sup>1</sup>, Chaitali Nangia, MD<sup>2</sup>, Andrew Nguyen<sup>3</sup>, Christopher Szeto, PhD<sup>3</sup>, Yulia Newton<sup>3</sup>, Patricia Spilman<sup>3</sup>, Sandeep B. Reddy, MD<sup>1\*</sup>

<sup>1</sup>NantHealth, Culver City, CA

<sup>2</sup>Chan Soon-Shiong Institute for Medicine, El Segundo, CA

<sup>3</sup>ImmunityBio LLC, Santa Cruz, CA

\*Corresponding author

### **SUPPLEMENTARY MATERIAL**

#### *Morphology and biomarker labeling in CNB*

MCC and small cell lung cancer (SCLC) may be morphologically very similar, but SCLC is typically negative for CK20 and positive for TTF-1; thus this case did not meet criteria for SCLC. As described in Kervarrec *et al* 2018 [1] MCC differs from lymph node metastasis from other neuroendocrine tumors by 7 discriminative criteria: elderly age, location of the tumor, extent of the disease, cytokeratin expression, TTF-1 expression, histologic type, and MCPyV detection (when positive). IHC data revealed frequent positivity for TTF-1 in MCC (and therefore this is not a definitive marker) and cytokeratin 7 (positive), either the absence or overexpression of p53, and frequent lack of neurofilament expression in virus-negative cases. By contrast, CK8, 18 and 20 and a CD99 with a dot pattern as well as high EMA expression are characteristic features of virus-positive MCC. In particular, the CD99 positivity is strongly

associated with MCPyV. CD99 was positive in the CNB here, but the tissue was negative for MCPyV.

#### *Mutations and frequencies in the CNB*

A total of 446 somatic variants were identified in the tumor, including three known pathogenic variants, four likely pathogenic variants, and 46 variants of unknown significance

(**Supplementary Table 1**). Microsatellite status was stable (MSS), with the tumor sample measuring only 0.79% more unstable than normal tissue. No expression of the APOBEC/AID family of cytosine deaminases [2] and no mutations in the exonuclease domain of DNA polymerase (POLE) [3, 4] were detected in the tumor. The mutational signature was consistent with failure of double-strand break-repair by homologous recombination, caused by *BRCA1/BRCA2* mutations.[5]

**Supplementary Table 1.** A subset of 53 variants in the CNB for the MCC patient. Variant allele frequency (VAF).

| Category     | Gene     | Variant      | Class         | VAF    |
|--------------|----------|--------------|---------------|--------|
| Pathogenic   | DMD      | p.W1660C     | Missense      | 0.2963 |
| Pathogenic   | FBXO11   | p.P49Q       | Missense      | 0.0104 |
| Pathogenic   | PABPC1   | p.K312Nfs*10 | Frame Shift   | 0.0595 |
| Likely Path. | ZNF117   | p.E189G      | Missense      | 0.0106 |
| Likely Path. | ZNF117   | p.K168E      | Missense      | 0.0145 |
| Likely Path. | ZNF181   | p.S287T      | Missense      | 0.0088 |
| Likely Path. | ZNF479   | p.R295K      | Missense      | 0.0115 |
| Unkn. Sig.   | ANK3     | p.D839Ifs*32 | Frame Shift   | 0.1395 |
| Unkn. Sig.   | ANTXR2   | p.A357del    | In-Frame Del. | 0.0263 |
| Unkn. Sig.   | ARHGEF10 | p.D215G      | Missense      | 0.0130 |
| Unkn. Sig.   | ARMC3    | c.733-1G>A   | Splice Site   | 0.0879 |
| Unkn. Sig.   | ATP13A1  | p.C515*      | Nonsense      | 0.0422 |

|            |          |                |               |        |
|------------|----------|----------------|---------------|--------|
| Unkn. Sig. | ATXN2L   | p.P84Q         | Missense      | 0.0058 |
| Unkn. Sig. | C15orf59 | p.D177G        | Missense      | 0.0065 |
| Unkn. Sig. | CATSPER1 | p.H250Sfs*13   | Frame Shift   | 0.2665 |
| Unkn. Sig. | CCDC64   | p.R548M        | Missense      | 0.0466 |
| Unkn. Sig. | CFAP46   | p.E1551*       | Nonsense      | 0.0402 |
| Unkn. Sig. | DEPDC5   | p.R1425Q       | Missense      | 0.0083 |
| Unkn. Sig. | DHRS2    | p.E83G         | Missense      | 0.0052 |
| Unkn. Sig. | DOCK5    | p.D328Efs*4    | Frame Shift   | 0.1046 |
| Unkn. Sig. | FAM196B  | p.C470*        | Nonsense      | 0.2798 |
| Unkn. Sig. | FLII     | p.R623Vfs*32   | Frame Shift   | 0.1181 |
| Unkn. Sig. | FOXD1    | p.R297Afs*169  | Frame Shift   | 0.0140 |
| Unkn. Sig. | GDF6     | p.A401D        | Missense      | 0.0510 |
| Unkn. Sig. | GDF7     | p.R51Gfs*43    | Frame Shift   | 0.0291 |
| Unkn. Sig. | IRS2     | p.P1036del     | In-Frame Del. | 0.0204 |
| Unkn. Sig. | ISLR2    | p.E675G        | Missense      | 0.0049 |
| Unkn. Sig. | LRFN5    | p.R52I         | Missense      | 0.1353 |
| Unkn. Sig. | MAFA     | p.H207Pfs*229  | Frame Shift   | 0.0256 |
| Unkn. Sig. | MLLT3    | p.S190del      | In-Frame Del. | 0.0064 |
| Unkn. Sig. | MROH8    | p.K31Tfs*1023  | Frame Shift   | 0.0067 |
| Unkn. Sig. | NANOS1   | p.R283Pfs*69   | Frame Shift   | 0.0049 |
| Unkn. Sig. | NEFM     | p.D197G        | Missense      | 0.0628 |
| Unkn. Sig. | NGFR     | p.C128Wfs*93   | Frame Shift   | 0.0037 |
| Unkn. Sig. | NOL4     | p.Q456K        | Missense      | 0.1164 |
| Unkn. Sig. | PABPC1   | p.Q558E        | Missense      | 0.0240 |
| Unkn. Sig. | PHLDA1   | p.Q203_Q204del | In-Frame Del. | 0.0073 |
| Unkn. Sig. | PLAC4    | p.I82T         | Missense      | 0.0165 |
| Unkn. Sig. | PLAC4    | p.L26_T27insV  | In-Frame Ins. | 0.0078 |
| Unkn. Sig. | PLEKHG2  | p.Q981Pfs*10   | Frame Shift   | 0.1270 |
| Unkn. Sig. | SDSL     | p.E109G        | Missense      | 0.0062 |
| Unkn. Sig. | SLC16A3  | p.F97Cfs*59    | Frame Shift   | 0.0057 |
| Unkn. Sig. | SYNE1    | p.I8281T       | Missense      | 0.0058 |
| Unkn. Sig. | SYNM     | p.R235Kfs*1332 | Frame Shift   | 0.0056 |
| Unkn. Sig. | TGFB1    | p.P10del       | In-Frame Del. | 0.0113 |
| Unkn. Sig. | UBR5     | p.M2688L       | Missense      | 0.2185 |
| Unkn. Sig. | ZFHX4    | p.P2057Tfs*82  | Frame Shift   | 0.0140 |

|            |        |          |          |        |
|------------|--------|----------|----------|--------|
| Unkn. Sig. | ZNF493 | p.E681G  | Missense | 0.0075 |
| Unkn. Sig. | ZNF91  | p.K1138E | Missense | 0.0043 |
| Unkn. Sig. | ZNF91  | p.G1109E | Missense | 0.0073 |
| Unkn. Sig. | ZNF91  | p.L853P  | Missense | 0.0086 |
| Unkn. Sig. | ZNF91  | p.T694A  | Missense | 0.0128 |
| Unkn. Sig. | ZNF91  | p.R333H  | Missense | 0.0066 |

### *Neoantigen prediction and expression*

For this patient, neoepitopes predicted from the CNB sample did not reveal any for Class 2 MHC peptides. The Class 1 MHCs peptides were at low allele frequency and RNA read analysis did not provide evidence they were expressed. The one potential neoantigen that was present within the RNA appeared to be expressed in less than 2% of the tumor.

### *Expression analysis*

The case was compared to a wide range of other cancers and MCC cases from TCGA RNA-Seq FASTQ files. Transcript quantification was computed as an average number of reads per base within each transcript. To assess gene expression, we obtained transcript per million (TPM) from RSEM output of RNA sequencing data. Per-gene expression was presented as a sum of TPM for all isoforms of a gene. All genes that have at least one isoform that begins with NM\_ (mRNA RefSeq category) were quantified to compose the final expression matrix of protein coding genes. To allow uniform and interpretable comparison of expression levels across samples, we normalized all quantifications by rescaling to gene-wise TPM values in sample-wise manner, therefore each sample's TPMs sum up to 1 million.

### *Mapping TCGA data into the FFPE RNA-Seq space for the MCC case*

We obtained public RNA sequencing data for 10,471 poly-A capture samples from the TCGA project for 33 different cancer types and mapped them into the space of the FFPE samples for the case represented here. We utilized quantile normalization 40 procedure, with FFPE samples'

expression quantiles as the target distribution; this quantile normalization procedure was performed separately for each gene. Zero expression values were excluded from both source and target datasets (per-gene) and attached those after the mapping was completed. In order to account for differences in cancer type composition between the two datasets, we implemented this quantile normalization in two steps. We first broke down TCGA dataset into two subsets: in the first, cancer type composition was matched (number of samples in each cancer type comprises at least the same percent of total samples as in the target FFPE dataset); and in the second, with the remaining samples that were not included into the first subset. We then quantile normalize the first subset as described above. The second subset was normalized using quantiles of the first subset as a source.

#### SUPPLEMENTARY REFERENCES

1. Kervarrec T, Zaragoza J, Gaboriaud P, Le Gouge A, Beby-Defaux A, Le Corre Y, Hainaut-Wierzbicka E, Aubin F, Bens G, Michenet P *et al*: **Differentiating Merkel cell carcinoma of lymph nodes without a detectable primary skin tumor from other metastatic neuroendocrine carcinomas: The ELECTHIP criteria.** *J Am Acad Dermatol* 2018, **78**(5):964-972.e963.
2. Rebhandl S, Huemer M, Greil R, Geisberger R: **AID/APOBEC deaminases and cancer.** *Oncoscience* 2015, **2**(4):320-333.
3. Church DN, Briggs SE, Palles C, Domingo E, Kearsey SJ, Grimes JM, Gorman M, Martin L, Howarth KM, Hodgson SV *et al*: **DNA polymerase epsilon and delta exonuclease domain mutations in endometrial cancer.** *Hum Mol Genet* 2013, **22**(14):2820-2828.
4. Aoude LG, Heitzer E, Johansson P, Gartside M, Wadt K, Pritchard AL, Palmer JM, Symmons J, Gerdes AM, Montgomery GW *et al*: **POLE mutations in families predisposed to cutaneous melanoma.** *Fam Cancer* 2015, **14**(4):621-628.
5. Alexandrov LB, Nik-Zainal S, Wedge DC, Aparicio SA, Behjati S, Biankin AV, Bignell GR, Bolli N, Borg A, Borresen-Dale AL *et al*: **Signatures of mutational processes in human cancer.** *Nature* 2013, **500**(7463):415-421.
